# Supplementary material
Source: publisher site journal article supplement (https://www.dovepress.com/article/298748)
Supplement: Supplementary file 1 [file get_supplementary_file.php]

Table S1. ICD-10 codes for major congenital malformations, specific groups

| **Organ system** | **ICD-10 code** | **Comment** |
| --- | --- | --- |
| Nervous system | Q00-Q07 | Minor anomalies excluded: Q0461, Q0782 |
| Eye | Q100, Q104, Q106-Q109, Q11-Q12, Q130-Q134, Q136-Q139, Q14-Q15 | Minor anomalies excluded: Q101-Q103, Q105, Q135 |
| Ear, Face and Neck | Q16, Q176-Q178, Q183, Q188, Q189 | Minor anomalies excluded: Q170-Q175, Q179, Q180- Q182, Q184-Q187 |
| Congenital Heart Defects | Q20-Q25, Q260, Q262-Q269 | Q250 and Q256 not included if GA <37 weeks |
| Respiratory System | Q300, Q32- Q34 | Minor anomalies excluded: Q320, Q331, Q336 |
| Orofacial Clefts | Q35-Q37 |  |
| Digestive System | Q38-Q45, Q790 | Minor anomalies excluded: Q381, Q382, Q3850, Q400, Q401, Q4021, Q430, Q4320, Q4381, Q4382, Q385A |
| Abdominal Wall Defects | Q792-Q793, Q795 |  |
| Urinary System | Q60-Q64, Q794 | Minor anomalies excluded: Q610, Q627, Q633 |
| Genital Organs | Q50-Q52, Q54-Q56 | Minor anomalies excluded: Q53, Q523, Q525, Q527, Q552A, Q552B, Q552E, Q552F |
| Limb | Q660-Q661, Q679, Q681-Q682, Q686-Q689, Q70-Q74 |  |
| Other | Q750, Q77, Q780, Q782-Q788, Q80-Q81, Q820-Q824, Q826-Q829, Q860, Q890, Q893-Q894 |  |
| Teratogenic/genetic syndomes, microdeletions and chromosomal abnormalities | Q861-Q869, P350-P352, P371, Q619, Q751, Q754, Q771-Q772, Q780, Q796, Q85, Q87, D821, Q90- Q92, Q930-Q939, Q95-Q99 | Infants with any of these ICD codes excluded |

GA, gestational age

ICD, International classification of disease

One infant can contribute to more than one of the above categories if they are diagnosed with more than one of the above ICD-10 codes.

| Table S2. Odds ratios of major congenital malformations according to level of HbA1c among 314,245 live born singleton children, North Denmark and Central Denmark Regions, 2000 – 2016. Subanalysis with further adjustment for hypertensive disorders of pregnancy. | | | | | | | | | | |
| --- | --- | --- | --- | --- | --- | --- | --- | --- | --- | --- |
| **Type of diabetes** | **Level of HbA1c, %** | | **Major malformations** | |  | **Model 1**a | |  | **Model 2b** | |
| **n** | **Prevalence**  **95% CI** | **Crude OR** | **Adjusteda OR**  **(95% CI)** |  | **Crude OR** | **Adjustedb OR (95% CI)** |
| No diabetes | - | 311,727 | 8,116 | 2.6 (2.5; 2.7) |  | - | - |  | 1.0 | 1.0 (reference) |
| Type 1 diabetes | <5.5 | 253 | 11 | 4.3 (1.8; 6.9) |  | 1.0 | 1.0 (reference) |  | 1.7 | 1.4 (0.9; 2.6) |
| 5.5 – <6.5 | 374 | 14 | 3.7 (1.8; 5.7) |  | 0.9 | 0.9 (0.4; 2.1) |  | 1.5 | 1.3 (0.7; 2.3) |
|  | 6.5 – <7.5 | 509 | 39 | 7.7 (5.4; 10.0) |  | 1.8 | 2.1 (1.0; 4.4) |  | 3.1 | 2.9 (2.1; 4.2) |
|  | 7.5 – <8.5 | 334 | 31 | 9.3 (6.2; 12.4) |  | 2.3 | 2.8 (1.3; 6.0) |  | 3.8 | 3.8 (2.5; 5.8) |
|  | 8.5 – <9.5 | 185 | 21 | 11.4 (6.8; 15.9) |  | 2.8 | 4.5 (2.0; 10.2) |  | 4.8 | 6.0 (3.7; 9.8) |
|  | ≥9.5 | 131 | 26 | 19.8 (13.0; 26.7) |  | 5.4 | 6.1 (2.7; 13.9) |  | 9.3 | 8.4 (5.0; 13.9) |
|  |  |  |  |  |  |  |  |  |  |  |
| No diabetes | - | 311,727 | 8,116 | 2.6 (2.5; 2.7) |  | - | - |  | 1.0 | 1.0 (reference) |
| Type 2 diabetes | <5.5 | 116 | <5 | 3.4 (0.1; 6.8) |  | 1.0 | 1.0 (reference) |  | 1.3 | 1.1 (0.4; 3.0) |
| 5.5 – <6.5 | 173 | 9 | 5.2 (0.5; 5.1) |  | 1.5 | 1.3 (0.3; 4.7) |  | 2.1 | 1.7 (0.8; 3.5) |
|  | 6.5 – <7.5 | 65 | <5 | 4.6 (0.0; 9.7) |  | 1.4 | 0.4 (0.0; 4.0) |  | 1.8 | 0.5 (0.1; 3.7) |
|  | 7.5 – <8.5 | 27 | <5 | 11.1 (0.0; 23.0) |  | 3.5 | 1.7 (0.3; 10.9) |  | 4.7 | 2.8 (0.6; 11.8) |
|  | ≥8.5 | 16 | <5 | 12.5 (0.0; 28.7) |  | 4.0 | 3.0 (0.5; 18.3) |  | 5.3 | 4.5 (1.0; 20.2) |

Abbreviations: CI: confidence interval, n: number, OR: odds ratio

aModel 1: women with diabetes mellitus and HbA1c<5.5 % as the reference group, adjusted for hypertensive disorders of pregnancy, maternal age, cigarette smoking, parity and year of birth.

bModel 2: women without diabetes mellitus as the reference group, adjusted for hypertensive disorders of pregnancy, maternal age, cigarette smoking, parity and year of birth.
